# Supplementary material for: The Avian Transcriptome Response to Malaria Infection
Source: PubMed Central journal article supplement (PMC4408411; doi:10.1093/molbev/msv016), 2015-01-29
Supplement: supp_msv016_Videvall_Supplementary_Figures_S1-5.pdf [file supp_msv016_Videvall_Supplementary_Figures_S1-5.pdf]

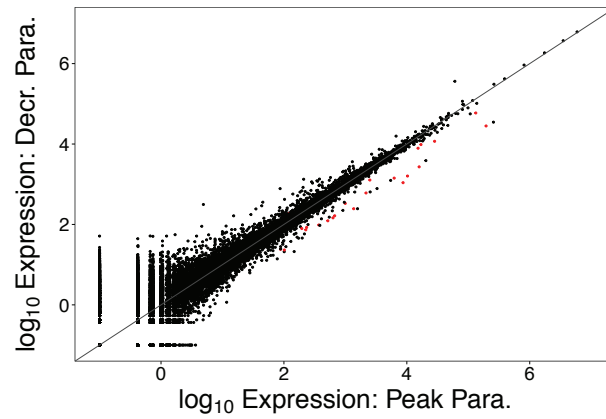

**Supplementary Figure S1. Differential gene expression analysis between peak and decreasing parasitemia stages.** Scatter plot of mean normalized gene expression levels (+ 0.1) in infected birds on a  $\log_{10}$  scale comparing peak parasitemia against the decreasing parasitemia stage. All genes in the transcriptome are shown as points ( $n = 18\ 618$ ), with non-significant genes in black and significantly differentially expressed genes in red.

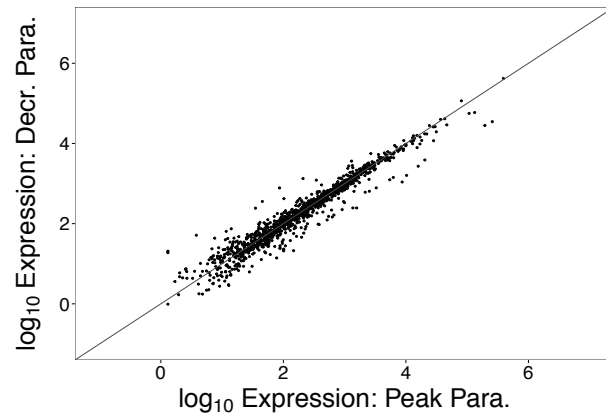

**Supplementary Figure S2. Expression levels of the significant genes during peak and decreasing parasitemia.** Scatter plot of mean normalized expression levels (+ 0.1) of all the significant genes during infection in inoculated birds (n = 1244) on a log<sub>10</sub> scale comparing peak parasitemia against decreasing parasitemia.

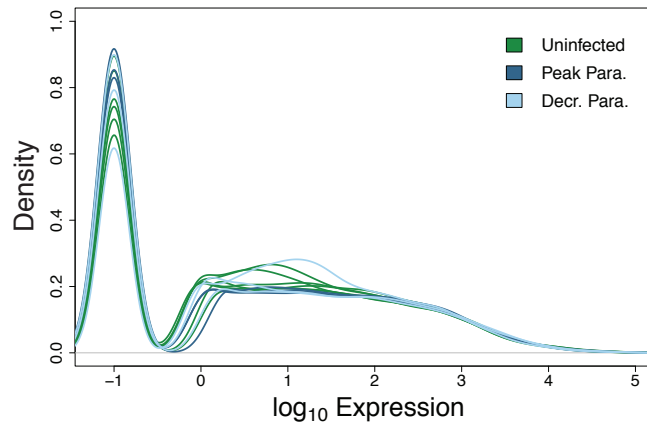

**Supplementary Figure S3. Density curves for all samples.** Density of mean normalized gene expression levels (+ 0.1) for each sample on a log<sub>10</sub> scale. Uninfected samples are shown in green, infected samples during peak parasitemia in dark blue, and infected samples during decreasing parasitemia in light blue.

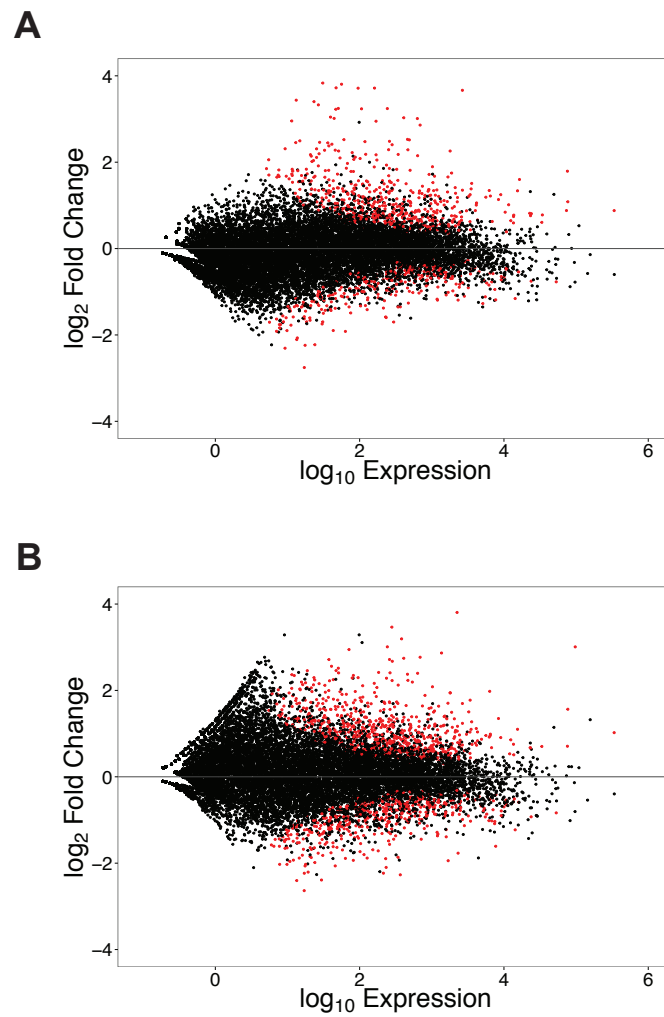

**Supplementary Figure S4. MA plots of peak and decreasing parasitemia stages.** MA plots comparing mean normalized gene expression levels (+ 0.1) to log<sub>2</sub> fold changes during (A) peak parasitemia and (B) decreasing parasitemia. All genes in the transcriptome are shown as points (n = 18 618), with non-significant genes in black and significantly differentially expressed genes in red.

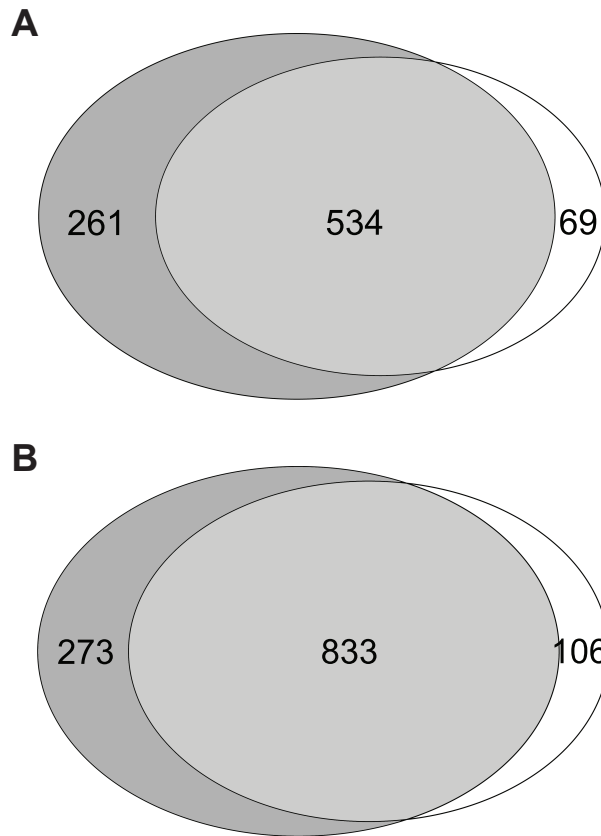

**Supplementary Figure S5. Overlap of significantly differentially expressed genes derived from two different programs.** Venn diagrams indicating overlap of significantly differentially expressed genes found in DESeq2 (dark grey) and edgeR (white), during **(A)** peak parasitemia and **(B)** decreasing parasitemia.
